# Supplementary material for: Transcriptome Analysis Provides Insights into the Root Response of Chinese Fir to Phosphorus Deficiency
Source: Research Square preprint supplement (doi:10.21203/rs.3.rs-400319/v1), 2021-04-09
Supplement: Supplementary file 2 [file 2e61be4e522bc8c221b70e58.docx]

Supplementary Material

## Supplementary Figures


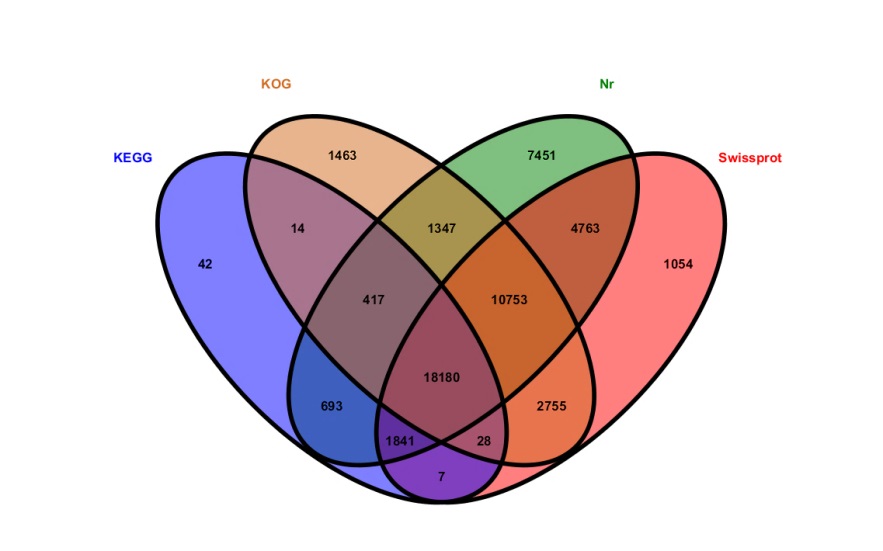


(A)


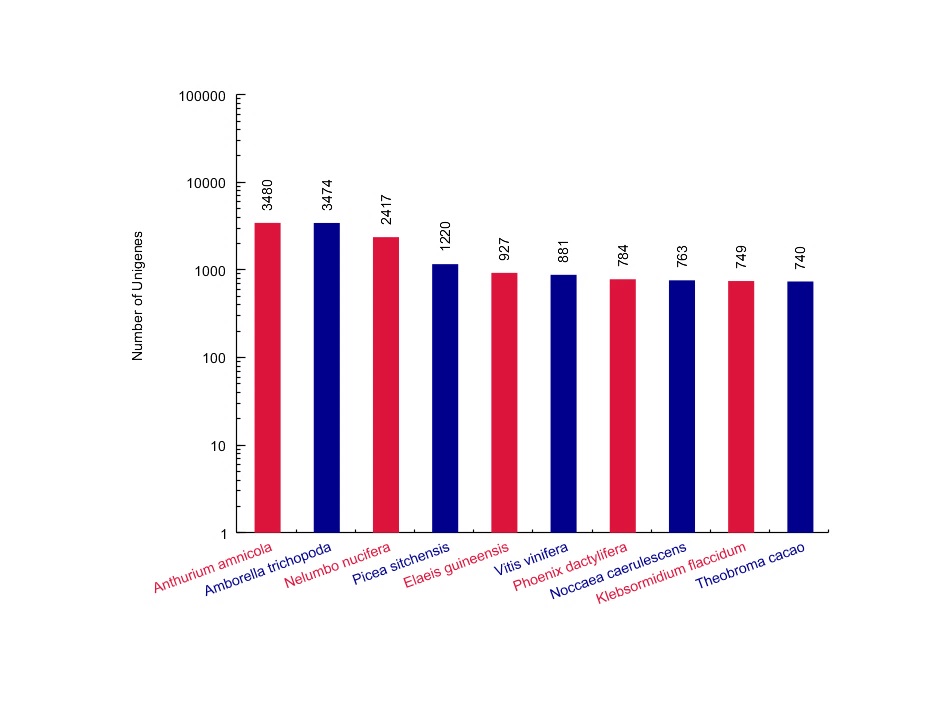


(B)


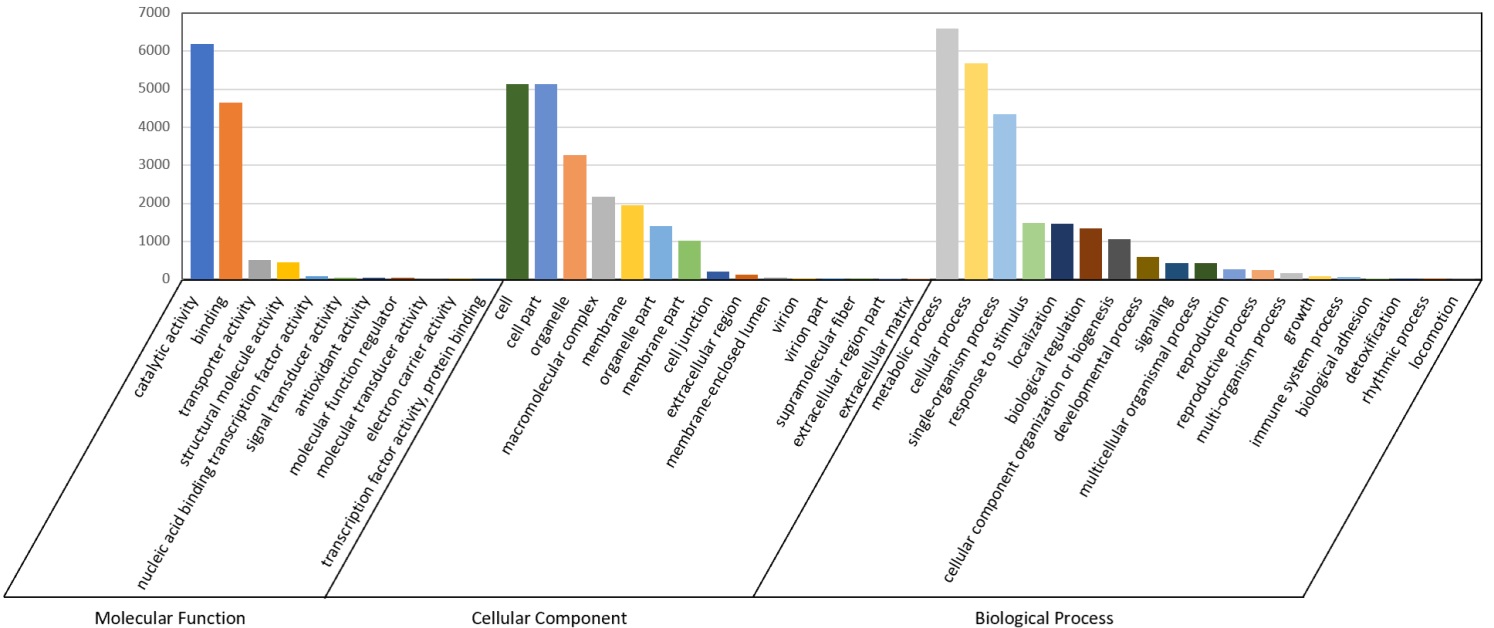


(C)


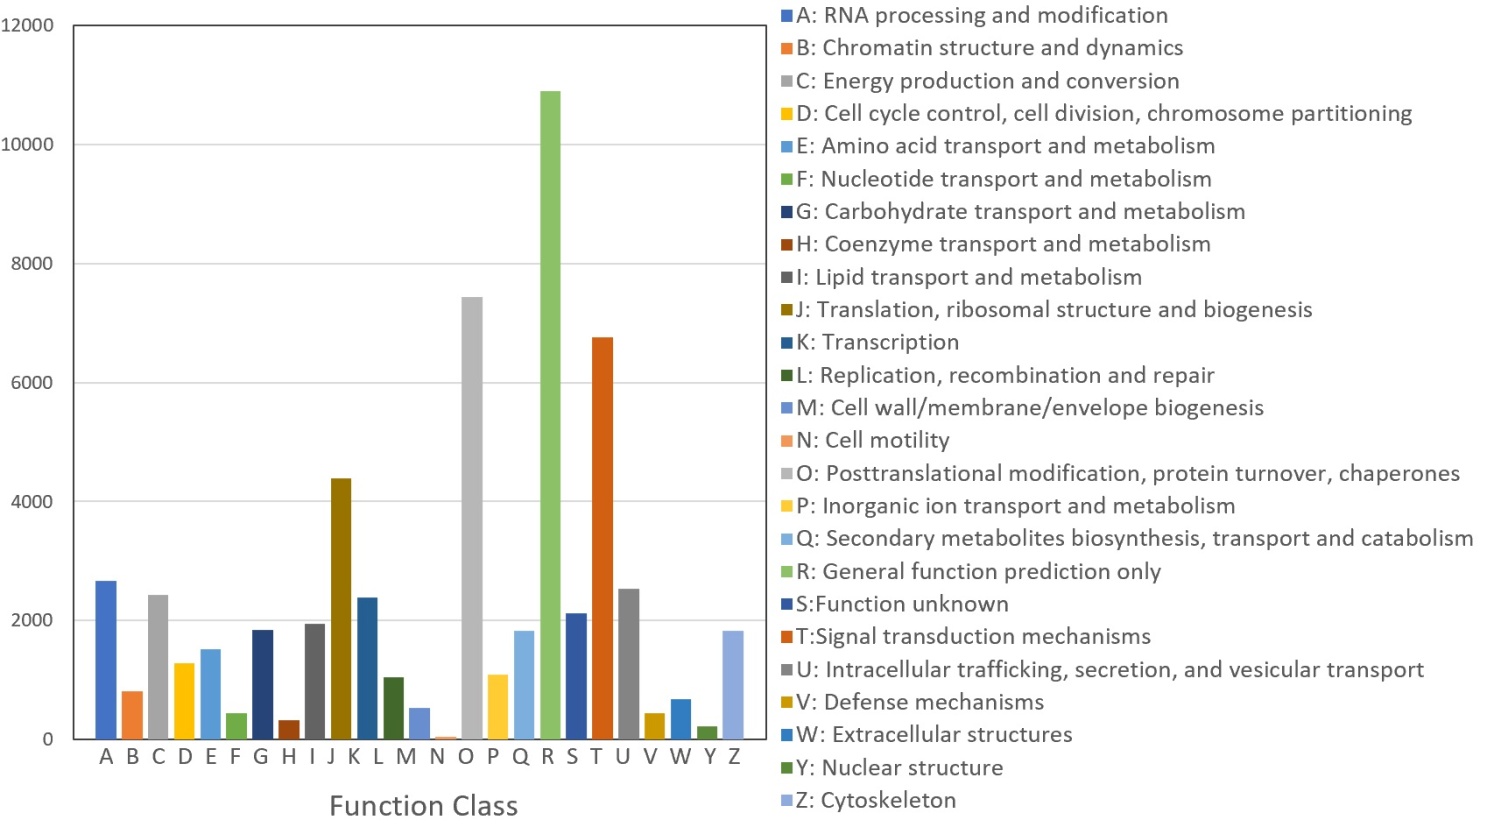


(D)

Supplementary Figure 1 Venn diagram of Unigenes annotated in the Nr, SwissProt, KOG and KEGG database (A); Nr Database annotated statistical chart of homologous species (B);GO Functional classification(C);KOG function classification of Unigenes in Chinese fir transcriptome(D).


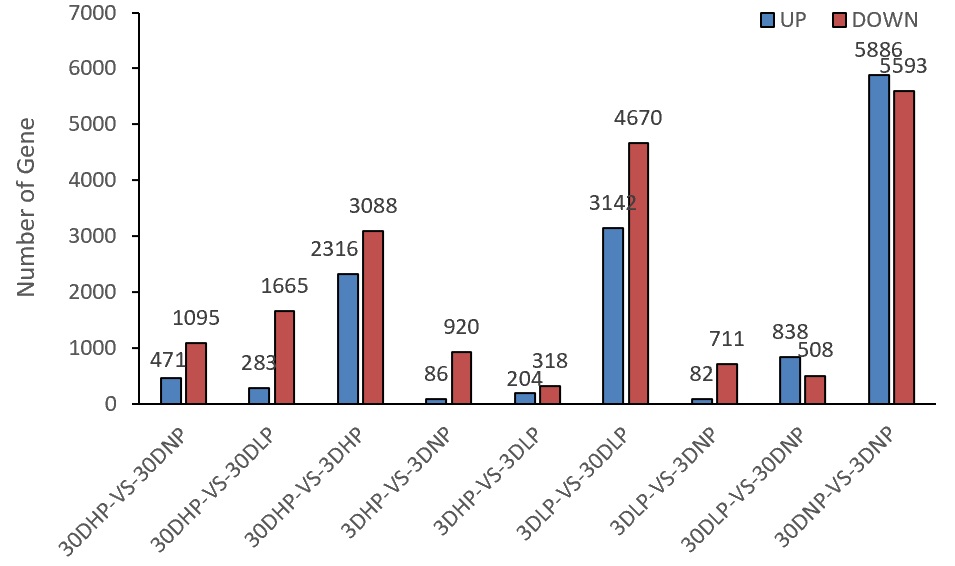


Supplementary Figure 2 Statistical histogram of differentially expressed genes between groups (A).


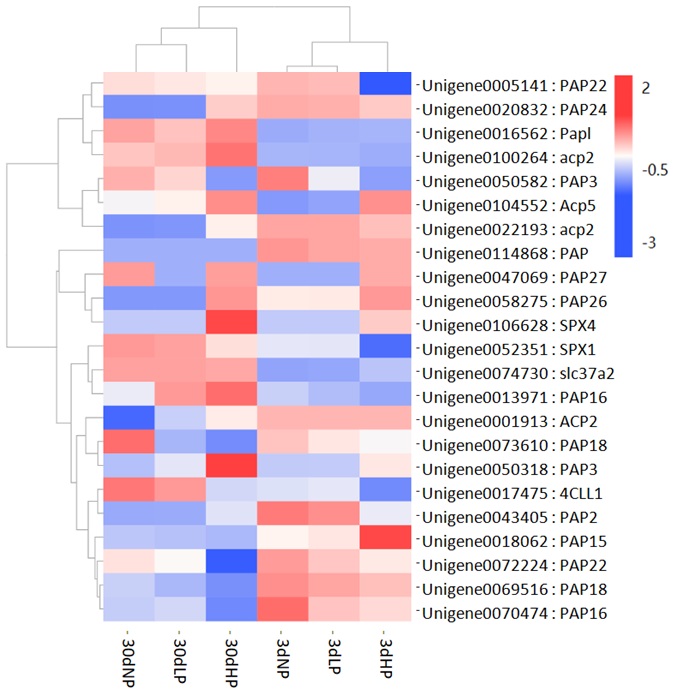


(A)


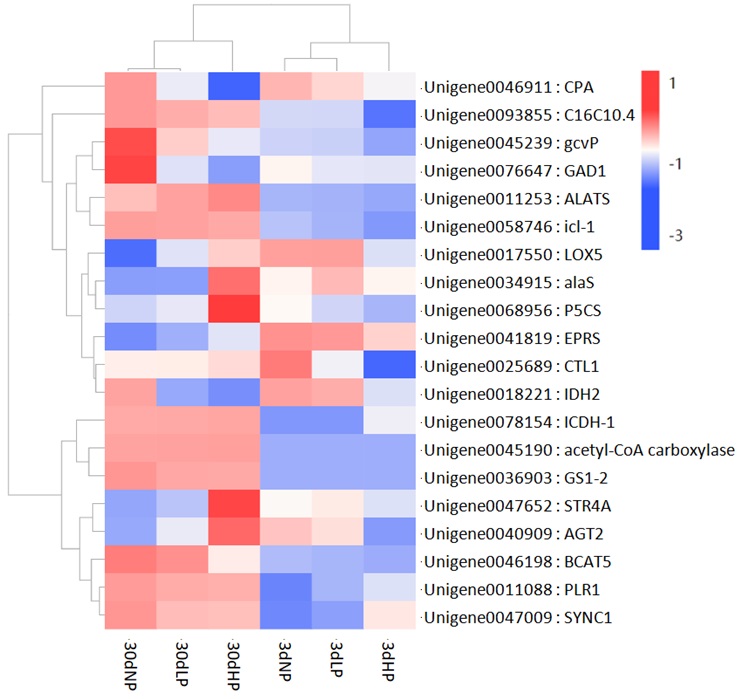


(B)

Supplementary Figure 3 Expression thermography of PAP, ACP and SPX genes in phosphorus response genes (A); Thermograms of key genes for organic acid synthesis and metabolism (B).
